# Supplementary material for: Highly flexible, foldable and stretchable Ni–Co layered double hydroxide/polyaniline/bacterial cellulose electrodes for high-performance all-solid-state supercapacitors
Source: Royal Society of Chemistry journal article supplement (doi:10.1039/c8ta05673k), 2018-01-01
Supplement: c8ta05673k1.pdf [file c8ta05673k1.pdf]

## Supplementary Materials

# Highly Flexible, Foldable and Stretchable Ni-Co Layered Double Hydroxide/Polyaniline/Bacterial Cellulose Electrodes for High-performance All-Solid-State Supercapacitors

Heng Wu,<sup>ab</sup> Yani Zhang,<sup>ab</sup> Wenyu Yuan,<sup>ab</sup> Yingxin Zhao,<sup>ab</sup> Shaohong Luo,<sup>c</sup> Xiaowen

Yuan,<sup>d</sup> Lianxi Zheng,<sup>c</sup> Laifei Cheng,<sup>\* ab</sup>

<sup>a</sup> Science and Technology on Thermostructural Composite Materials Laboratory, Northwestern Polytechnical University, 710072, Xi'an, China.

<sup>b</sup> State Key Laboratory of Solidification Processing, Northwestern Polytechnical University, 710072, Xi'an, China.

<sup>c</sup> Department of Mechanical Engineering, Khalifa University, P.O.Box: 127788, Abu Dhabi, UAE.

<sup>d</sup> School of Engineering and Advanced Technology, Massey University, Private Bag 102904, Auckland 0745, New Zealand

**\*Corresponding author:** [chenglf@nwpu.edu.cn](mailto:chenglf@nwpu.edu.cn)

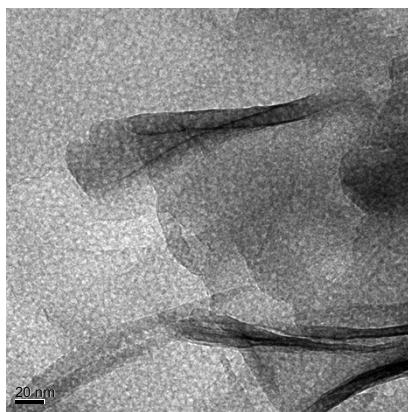

**Fig. S1.** TEM image of the NiCo-LDH from NiCo-LDH/PANI/BC.

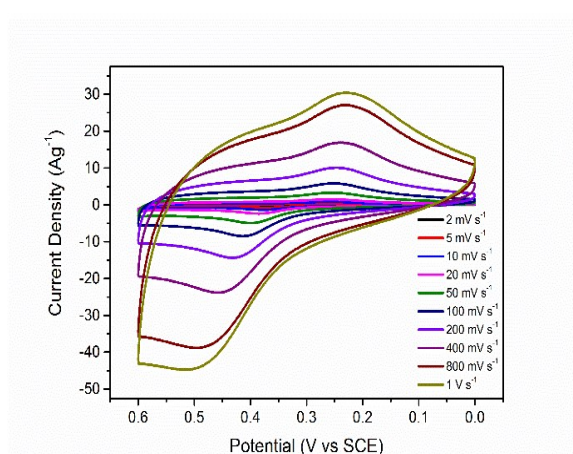

**Fig. S2.** CV curves of the PANI/BC obtained at various scan rates of 2-1000  $\text{mV s}^{-1}$ .

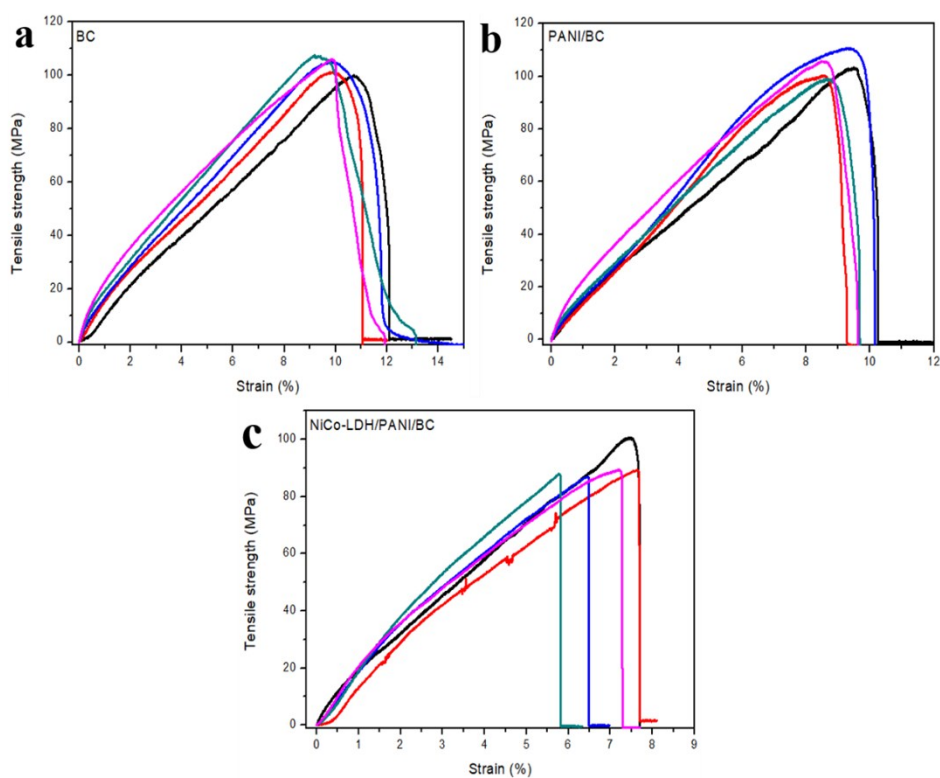

**Fig. S3.** Stress-strain curves of the (a) BC, (b) PANI/BC and (c) NiCo-LDH/PANI/BC.

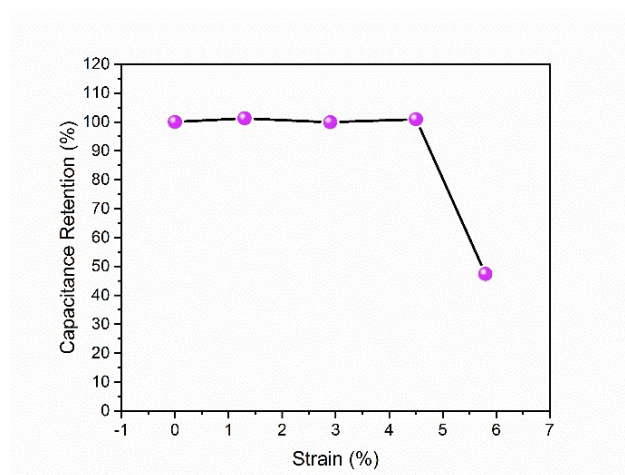

**Fig. S4.** Capacitance retention of the NiCo-LDH/PANI/BC during stretching.

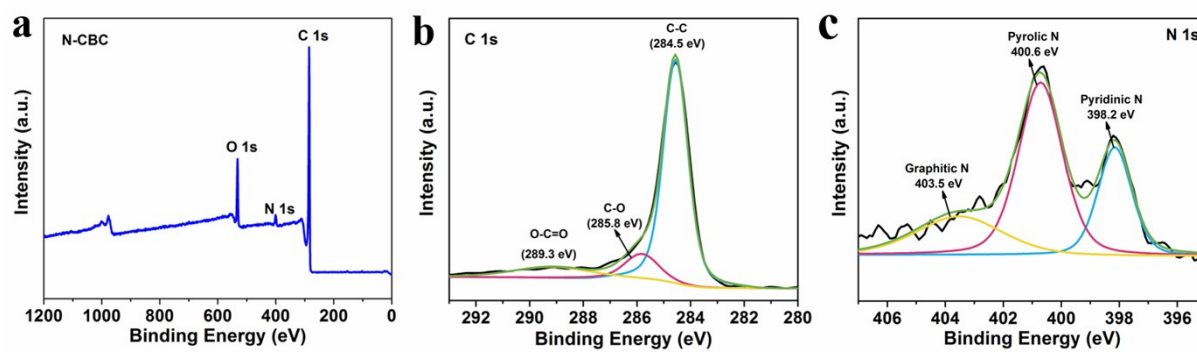

**Fig. S5.** (a) XPS survey, (b) high-resolution spectra of C 1s and (c) N 1p for the obtained N-CBC nanofibers.

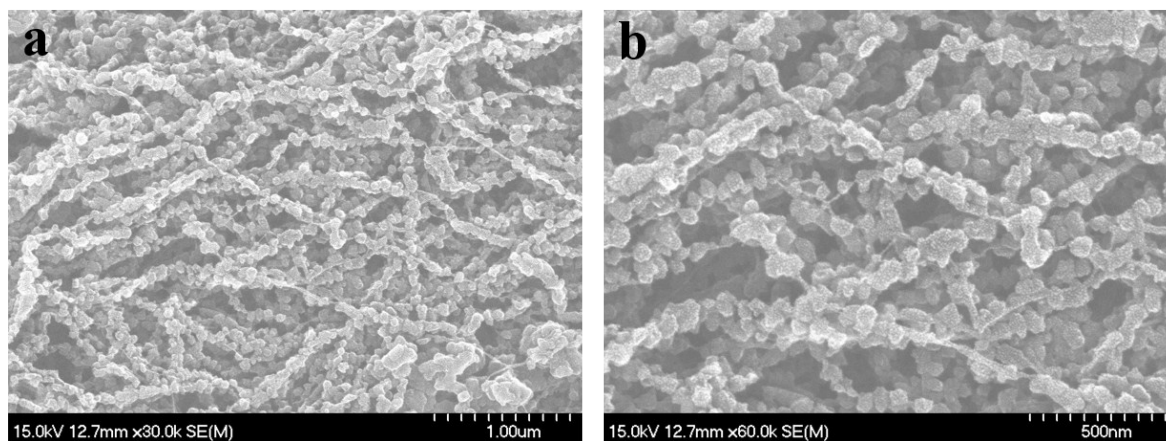

**Fig. S6.** SEM images of the N-CBC nanofibers.

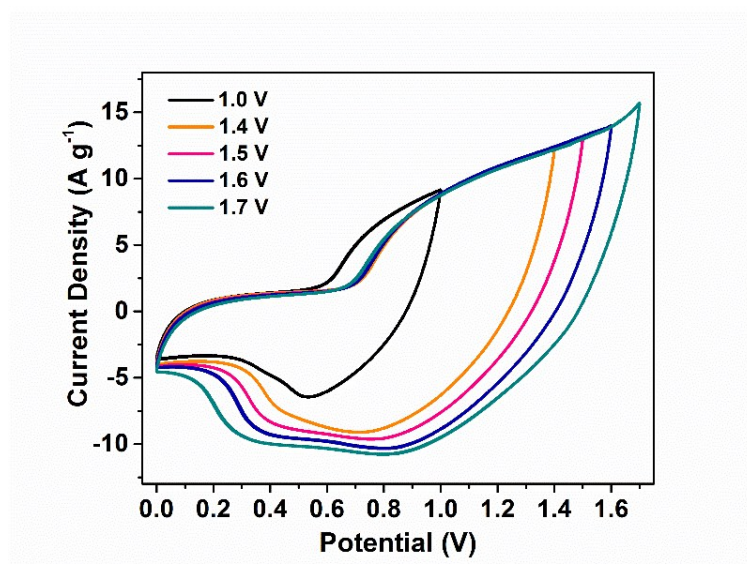

**Fig. S7.** An assembled flexible ASC in various voltage windows at a scan rate of 100 mV s<sup>-1</sup>.

**Table S1. Specific capacitance, flexibility and tensile strength reported in literature for flexible electrodes.**

| Samples                                     | Electrolyte                          | Specific Capacitance                                                | Flexibility                                                   | Tensile Strength | Ref.      |
|---------------------------------------------|--------------------------------------|---------------------------------------------------------------------|---------------------------------------------------------------|------------------|-----------|
| NiCo <sub>2</sub> O <sub>4</sub> /CNT film  | 2 M KOH                              | 1590 F g <sup>-1</sup> at 0.5 A g <sup>-1</sup> (3)-electrode       | ~100% capacitance retention after 1 bending                   | -                | 53        |
| NiCo <sub>2</sub> O <sub>4</sub> /CNT paper | 2 M KOH                              | 1752 F g <sup>-1</sup> at 1 A g <sup>-1</sup> (3)-electrode         | ~100% capacitance retention after 1 bending                   | -                | 54        |
| PANI/CNT film                               | (PVA)-H <sub>3</sub> PO <sub>4</sub> | 315 F g <sup>-1</sup> at 0.5 A g <sup>-1</sup> (2)-electrode        | 93% capacitance retention after 150 bending cycles at 180°    | -                | 55        |
| MnO <sub>2</sub> /RGO film                  | PVA-LiCl                             | 305 F g <sup>-1</sup> at 5 mV s <sup>-1</sup> (3)-electrode         | ~100% capacitance retention after 1 bending                   | -                | 56        |
| AC/RGO fiber                                | 1 M H <sub>2</sub> SO <sub>4</sub>   | 180 F g <sup>-1</sup> at 0.4 A g <sup>-1</sup> (3)-electrode        | ~100% capacitance retention after 1000 bending cycles at 180° | 23 MPa           | 57        |
| PPY/RGO fiber                               | (PVA)-H <sub>2</sub> SO <sub>4</sub> | 107.2 mF cm <sup>-2</sup> at 0.24 mA cm <sup>-2</sup> (2)-electrode | ~100% capacitance retention after 1000 bending cycles         | 80 MPa           | 58        |
| MoS <sub>2</sub> /CC                        | PVA-LiCl                             | 305 F g <sup>-1</sup> at 5 mV s <sup>-1</sup> (3)-electrode         | ~100% capacitance retention after 1 bending                   | -                | 59        |
| NiFe <sub>2</sub> O <sub>4</sub> /CC        | 1 M H <sub>2</sub> SO <sub>4</sub>   | 1135 F g <sup>-1</sup> at 2 mA cm <sup>-2</sup> (3)-electrode       | ~100% capacitance retention after 1 bending                   | -                | 60        |
| Ni(OH) <sub>2</sub> /RGO/BC                 | 2 M KOH                              | 877 F g <sup>-2</sup> at 5 mA cm <sup>-2</sup> (3)-electrode        | ~100% capacitance retention after 1 bending                   | 49 MPa           | 61        |
| NiCo-LDH/PANI/BC                            | 2 M KOH                              | 1690 F g <sup>-1</sup> at 1 A g <sup>-1</sup> (3)-electrode         | 94.2% capacitance retention after 1000 bending cycles at 150° | 91 MPa           | This work |
